# Supplementary material for: Development and Validation of a Risk Score to Predict Low Birthweight Using Characteristics of the Mother: Analysis from BUNMAP Cohort in Ethiopia
Source: MDPI journal article supplement (doi:10.3390/jcm9051587), 2020-05-23
Supplement: s1 [file s1]

TRIPOD Checklist: Development and Validation of a multivariate model and risk score to predict low birthweight using characteristics of the mother.

| Section/Topic                | Item | Checklist Item                                                                                                                                                                                       | Page                                         |
|------------------------------|------|------------------------------------------------------------------------------------------------------------------------------------------------------------------------------------------------------|----------------------------------------------|
| <b>Title and abstract</b>    |      |                                                                                                                                                                                                      |                                              |
| Title                        | 1    | D;V Identify the study as developing and/or validating a multivariable prediction model, the target population, and the outcome to be predicted.                                                     | 1                                            |
| Abstract                     | 2    | D;V Provide a summary of objectives, study design, setting, participants, sample size, predictors, outcome, statistical analysis, results, and conclusions.                                          | 1                                            |
| <b>Introduction</b>          |      |                                                                                                                                                                                                      |                                              |
| Background and objectives    | 3a   | D;V Explain the medical context (including whether diagnostic or prognostic) and rationale for developing or validating the multivariable prediction model, including references to existing models. | 1 and 2                                      |
|                              | 3b   | D;V Specify the objectives, including whether the study describes the development or validation of the model or both.                                                                                | 2                                            |
| <b>Methods</b>               |      |                                                                                                                                                                                                      |                                              |
| Source of data               | 4a   | D;V Describe the study design or source of data (e.g., randomized trial, cohort, or registry data), separately for the development and validation data sets, if applicable.                          | 2 and 3                                      |
|                              | 4b   | D;V Specify the key study dates, including start of accrual; end of accrual; and, if applicable, end of follow-up.                                                                                   | 2                                            |
| Participants                 | 5a   | D;V Specify key elements of the study setting (e.g., primary care, secondary care, general population) including number and location of centres.                                                     | 2                                            |
|                              | 5b   | D;V Describe eligibility criteria for participants.                                                                                                                                                  | 3                                            |
|                              | 5c   | D;V Give details of treatments received, if relevant.                                                                                                                                                | NA                                           |
| Outcome                      | 6a   | D;V Clearly define the outcome that is predicted by the prediction model, including how and when assessed.                                                                                           | 3                                            |
|                              | 6b   | D;V Report any actions to blind assessment of the outcome to be predicted.                                                                                                                           | NA                                           |
| Predictors                   | 7a   | D;V Clearly define all predictors used in developing or validating the multivariable prediction model, including how and when they were measured.                                                    | 3                                            |
|                              | 7b   | D;V Report any actions to blind assessment of predictors for the outcome and other predictors.                                                                                                       | NA                                           |
| Sample size                  | 8    | D;V Explain how the study size was arrived at.                                                                                                                                                       | NA (all with the outcome)                    |
| Missing data                 | 9    | D;V Describe how missing data were handled (e.g., complete-case analysis, single imputation, multiple imputation) with details of any imputation method.                                             | 3, 4                                         |
| Statistical analysis methods | 10a  | D Describe how predictors were handled in the analyses.                                                                                                                                              | 3, 4                                         |
|                              | 10b  | D Specify type of model, all model-building procedures (including any predictor selection), and method for internal validation.                                                                      | 4                                            |
|                              | 10c  | V For validation, describe how the predictions were calculated.                                                                                                                                      | 4                                            |
|                              | 10d  | D;V Specify all measures used to assess model performance and, if relevant, to compare multiple models.                                                                                              | 4                                            |
|                              | 10e  | V Describe any model updating (e.g., recalibration) arising from the validation, if done.                                                                                                            | 4                                            |
| Risk groups                  | 11   | D;V Provide details on how risk groups were created, if done.                                                                                                                                        | 4, 5                                         |
| Development vs. validation   | 12   | V For validation, identify any differences from the development data in setting, eligibility criteria, outcome, and predictors.                                                                      | NA (internal validation using bootstrapping) |

TRIPOD Checklist: Development and Validation of a multivariate model and risk score to predict low birthweight using characteristics of the mother.

| Results                   |     |     |                                                                                                                                                                                                       |         |
|---------------------------|-----|-----|-------------------------------------------------------------------------------------------------------------------------------------------------------------------------------------------------------|---------|
| Participants              | 13a | D;V | Describe the flow of participants through the study, including the number of participants with and without the outcome and, if applicable, a summary of the follow-up time. A diagram may be helpful. | 5       |
|                           | 13b | D;V | Describe the characteristics of the participants (basic demographics, clinical features, available predictors), including the number of participants with missing data for predictors and outcome.    | 5       |
|                           | 13c | V   | For validation, show a comparison with the development data of the distribution of important variables (demographics, predictors and outcome).                                                        | 5       |
| Model development         | 14a | D   | Specify the number of participants and outcome events in each analysis.                                                                                                                               | 5 and 6 |
|                           | 14b | D   | If done, report the unadjusted association between each candidate predictor and outcome.                                                                                                              | 6       |
| Model specification       | 15a | D   | Present the full prediction model to allow predictions for individuals (i.e., all regression coefficients, and model intercept or baseline survival at a given time point).                           | 6       |
|                           | 15b | D   | Explain how to use the prediction model.                                                                                                                                                              | 6 and 7 |
| Model performance         | 16  | D;V | Report performance measures (with CIs) for the prediction model.                                                                                                                                      | 7, 8, 9 |
| Model-updating            | 17  | V   | If done, report the results from any model updating (i.e., model specification, model performance).                                                                                                   | 7, 8, 9 |
| Discussion                |     |     |                                                                                                                                                                                                       |         |
| Limitations               | 18  | D;V | Discuss any limitations of the study (such as nonrepresentative sample, few events per predictor, missing data).                                                                                      | 10      |
| Interpretation            | 19a | V   | For validation, discuss the results with reference to performance in the development data, and any other validation data.                                                                             | NA      |
|                           | 19b | D;V | Give an overall interpretation of the results, considering objectives, limitations, results from similar studies, and other relevant evidence.                                                        | 9,10    |
| Implications              | 20  | D;V | Discuss the potential clinical use of the model and implications for future research.                                                                                                                 | 10      |
| Other information         |     |     |                                                                                                                                                                                                       |         |
| Supplementary information | 21  | D;V | Provide information about the availability of supplementary resources, such as study protocol, Web calculator, and data sets.                                                                         | 10      |
| Funding                   | 22  | D;V | Give the source of funding and the role of the funders for the present study.                                                                                                                         | 10      |

\*Items relevant only to the development of a prediction model are denoted by D, items relating solely to a validation of a prediction model are denoted by V, and items relating to both are denoted D;V.
